# Supplementary material for: Constructing Fe–N-doped porous carbon nanofibers for a pH-universal ORR and switchable, superior Zn–air batteries
Source: Royal Society of Chemistry journal article supplement (doi:10.1039/d3ta06537e), 2023-11-29
Supplement: d3ta06537e1.pdf [file d3ta06537e1.pdf]

## ***Supporting Information***

### **Constructing Fe-N-doped porous carbon nanofiber for pH-universal ORR and switchable superior Zn-air batteries**

*Yu Ma<sup>1,2</sup>, Yuhan Xiao<sup>1</sup>, Yanfeng Ge<sup>1</sup>, Degong Gao<sup>3</sup>, Yunge Zhang<sup>1</sup>, Zepeng Li<sup>1\*</sup> and Yingdong*

*Han<sup>1,2\*</sup>*

*<sup>1</sup> College of Science, Civil Aviation University of China, Tianjin, P. R. China*

*<sup>2</sup> Institute of Environment and Sustainable Development, Civil Aviation University of China,  
Tianjin, P. R. China*

*<sup>3</sup> Shandong Daisheng Construction Co., Ltd, Taian, P. R. China*

*\*Corresponding author:*

E-mail: hansuo@126.com (Y. Han)

E-mail: li\_zepeng@163.com (Z. Li)

## Experimental Section

*Chemical reagents and raw materials:* Bacterial cellulose (BC) dispersion was kindly provided by Hainan Yeguo Foods Co., Ltd., Hainan, China.  $\text{FeCl}_3 \cdot 6\text{H}_2\text{O}$ ,  $\text{Zn}(\text{NO}_3)_2 \cdot 6\text{H}_2\text{O}$ , 2-methylimidazole (2-MIM) and tert-butyl alcohol (TBA) were purchased from Aladdin and directly used without further purification. The commercial Pt/C catalyst (20 wt%), 0.1 M phosphate buffered saline (PBS, pH 7.4) and Nafion solution (5 wt%) were acquired from Sigma-Aldrich. All the water used in the present study was deionized water.

*Preparation of Fe(Zn)-N-C:* Bacterial cellulose nanofibers were chemical treatments via an improved 2,2,6,6-tetramethylpiperidine-1-oxyl radical (TEMPO) method according to our previous work<sup>1</sup>. The TEMPO-mediated cellulose nanofibers were named as TOBC. The  $\text{Zn}(\text{NO}_3)_2 \cdot 6\text{H}_2\text{O}$  (86 mg) was mixed with a suspension of ion-exchanged TOBC (25 mL BC) immediately. Then mixtures were washed by deionized water five times. The product was poured into 25 mL of 5:1 (v:v) water/TBA mixture, followed by stirring at room temperature (R.T.) for 2 h. The aqueous suspension was added into  $\text{FeCl}_3 \cdot 6\text{H}_2\text{O}$  (50 mg),  $\text{Zn}(\text{NO}_3)_2 \cdot 6\text{H}_2\text{O}$  (255.8 mg) and 2-MIM (2824.6 mg) together and followed by stirring for 15 minutes, then through centrifugation, repetitive rinsing by deionized water and freeze-drying for 48 h. Finally, the mixture was pyrolyzed in Ar atmosphere separately at 900 °C for 2 h. The corresponding carbon aerogels were denoted as Fe(Zn)-N-C.

*Synthesis of control samples:* (1) Mesoporous carbon (CF) was synthesized in parallel by the same method as that for Fe(Zn)-N-C, except for no using  $\text{FeCl}_3 \cdot 6\text{H}_2\text{O}$ ,  $\text{Zn}(\text{NO}_3)_2 \cdot 6\text{H}_2\text{O}$  and 2-MIM. (2) Fe-N-C was obtained in parallel by the same synthesis route as that for Fe(Zn)-N-C, except for no addition of  $\text{Zn}(\text{NO}_3)_2 \cdot 6\text{H}_2\text{O}$ . (3) (Zn)-N-C was prepared in parallel by the same way as that Fe(Zn)-N-C, except for no applying for  $\text{FeCl}_3 \cdot 6\text{H}_2\text{O}$ . (4) Fe(Zn)-N-C- $x$  ( $x=1, 2, 3$ ), where  $x$  indicates the different amount of  $\text{FeCl}_3 \cdot 6\text{H}_2\text{O}$  (35, 50 and 65 mg). Unless otherwise specified, Fe(Zn)-N-C refers to the sample prepared at  $x=2$  ( $\text{FeCl}_3 \cdot 6\text{H}_2\text{O}$ , 50 mg).

*Microstructural Characterization:* The as-prepared samples were examined by transmission electron microscopy (TEM, JEM-2100F, JEOL, Japan) to character the morphologies and the microstructures. X-ray powder diffraction (XRD, D8 Advance, Bruker, Germany) with Cu-K  $\alpha$  radiation ( $\lambda=1.5406$  Å) and Raman spectroscopy (Renishaw inVia, UK Raman spectrometer system) with a laser wavelength of 532 nm investigated to obtain the crystal structure of all samples. The chemical compositions of samples were studied by X-ray photoelectron spectroscopy (XPS, ES-CALAB 250Xi, Thermo Fisher Scientific, America). N<sub>2</sub> sorption isotherms were determined by the Tristar II (Micrometrics, ASAP 2020 HD88) at 77 K. The specific surface area (SSA) was calculated using Brunauer-Emmett-Teller (BET) model. Pore size distribution was analyzed by Barrett-Joyner-Halenda (BJH) model based on the adsorption data.

*Electrochemical performance characterization:* The ORR electrochemical tests were carried out by using electrochemical workstation (CHI 760E, CH Instruments Inc., Shanghai, China) with a rotating disk electrode (RDE) and rotating ring-disk electrode (RRDE) with a Pt ring in a standard three-electrode cell at room temperature. A graphite rod was employed for counter electrode, glassy carbon (RDE or RRDE) coated with catalytic material as the working electrode and reference electrode of Hg/HgO for tests in 0.1 M KOH and 0.1 M PBS buffer (pH 7.4), reference electrode of Ag/AgCl in 0.5 M H<sub>2</sub>SO<sub>4</sub>. All recorded potentials are given relative to a reversible hydrogen electrode (RHE) by experimental calibrations: Pt foil was used as both the working electrode and counter electrode, and the electrolyte was saturated with H<sub>2</sub> provided by hydrogen generator. Our result shows that the  $E(\text{Ag/AgCl})$  is lower than  $E(\text{RHE})$  by 0.222 V in 0.5 M H<sub>2</sub>SO<sub>4</sub>,  $E(\text{Hg/HgO})$  by 0.882 V in 0.1 M KOH and 0.557 V in 0.1 M PBS.

The working electrode was prepared as follows: 4 mg of as-fabricated catalysts was first dispersed in the mixture of deionized water, ethanol and 5% Nafion (6:3:1) by sonication for 30 min in an ice-water bath. Then 5  $\mu\text{l}$  of the ink was dropped on the polished glassy carbon electrode (RDE) to obtain catalysts loading of 0.28 mg cm<sup>-2</sup> (8.9  $\mu\text{l}$  of the ink for the RRDE)

and dried 1 hour in the air. For comparison, commercial Pt/C (20 wt%) catalyst was also measured with loading of 25  $\mu\text{gpt cm}^{-2}$ .

Before each ORR testing, the system was saturated with  $\text{O}_2$  to remove the surface contamination of the catalysts in 0.1 M KOH, 0.5 M  $\text{H}_2\text{SO}_4$  and 0.1 M PBS solutions, respectively. Cyclic voltammetry (CV) curves were recorded at a scan rate of 20  $\text{mV s}^{-1}$  in  $\text{N}_2$ - or  $\text{O}_2$ -saturated electrolytes. Linear sweep voltammetry (LSV) was collected at a scan rate of 10  $\text{mV s}^{-1}$  at a different rotation speed of 400-2025 rpm. Rotating ring-disk electrode (RRDE) measurements were performed at a rotating speed of 1600 rpm with a scan rate of 10  $\text{mV s}^{-1}$  and the ring potential was fixed at 1.4 V versus RHE.

The kinetics parameters were evaluated using the Koutecky-Levich (K-L) equation as follows:

$$\frac{1}{j} = \frac{1}{j_L} + \frac{1}{j_K} = \frac{1}{B\omega^{1/2}} + \frac{1}{j_K} \quad (1)$$

$$B = 0.62 nFC_0(D_0)^{2/3}v^{-1/6} \quad (2)$$

where  $j$ ,  $j_L$  and  $j_K$  are the measured, diffusion-limiting and kinetic current densities, respectively.  $\omega$  is the electrode rotation rate in rpm;  $F$  is the Faraday constant ( $F = 96485 \text{ C mol}^{-1}$ );  $C_0$  is the bulk concentration of  $\text{O}_2$  ( $1.2 \times 10^{-6} \text{ mol cm}^{-3}$ );  $D_0$  is the diffusion coefficient of  $\text{O}_2$  ( $1.9 \times 10^{-5} \text{ cm}^2 \text{ s}^{-1}$ );  $v$  represents the kinematic viscosity of the electrolyte ( $0.01 \text{ cm}^2 \text{ s}^{-1}$ ).

In order to plot the Tafel curves, the kinetic current was calculated from the mass-transport correction of the RDE using:

$$j_K = \frac{j \times j_L}{j_L - j} \quad (3)$$

For RRDEs, the peroxide ( $\text{H}_2\text{O}_2$ ) content and the transferred electron number ( $n$ ) relative to the total products was determined based on the following equations:

$$n = 4 \times \frac{I_D}{\frac{I_R}{N} + I_D} \quad (4)$$

$$\text{H}_2\text{O}_2(\%) = 200 \times \frac{I_R/N}{\frac{I_R}{N} + I_D} \quad (5)$$

where  $I_D$  and  $I_R$  represent the disk current and the value of ring current, respectively, and  $N=0.37$  is the current collection efficiency of the Pt ring.

The double layer capacitances were carried out by CV in a potential range from 1.092 V to 1.192 V vs. RHE in 0.1 M KOH solution. The scan rates were measured from 10 mV s<sup>-1</sup> to 100 mV s<sup>-1</sup>. The  $C_{dl}$  can be determined by calculating the half of the slope by plotting the  $\Delta j$  ( $j_a - j_c$ ) at 1.142 V vs. RHE against the scan rates. Furthermore, electrochemical impedance spectroscopy (EIS) was performed in the frequency range of 0.01 Hz to 1 M Hz in O<sub>2</sub>-saturated 0.1 M KOH, 0.5 M H<sub>2</sub>SO<sub>4</sub> and 0.1 M PBS solutions, respectively, while perturbation amplitude was set to 5 mV. The durability measurement of the as-prepared catalysts was performed by applying a constant potential at a rotating rate of 1600 rpm.

**Liquid Zn-air battery assembly:** Zn-air batteries were tested on home-made alkaline/neutral electrochemical cells, where Zn foil as active anode, 6 M KOH was used as the alkaline electrolyte and 4 M NH<sub>4</sub>Cl+2 M KCl as the neutral electrolyte. For Pt/C and Fe(Zn)-N-C samples, 5 mg catalyst was ultrasonically dispersed in 1 mL ethanol with 100  $\mu$ L 5% Nafion to form a homogenous ink. The catalyst ink was then dropped on a cleaned carbon cloth (1.0 mg cm<sup>-2</sup>), which could be explored as air cathode (without the addition of conductive carbon black). All measurements were carried out on the as-fabricated cell with a CHI760E workstation and LAND multi-channel battery testing system (CT2001A, Wuhan, China) at room temperature.

The specific capacity ( $C$ , mAh g<sup>-1</sup>) was calculated according to the following equation:

$$C = \frac{I \Delta t}{m_{Zn}} \quad (6)$$

where  $I$  (mA) represents the current,  $\Delta t$  (h) is the service time and  $m_{Zn}$  (g) is the weight of the consumed Zn anode.

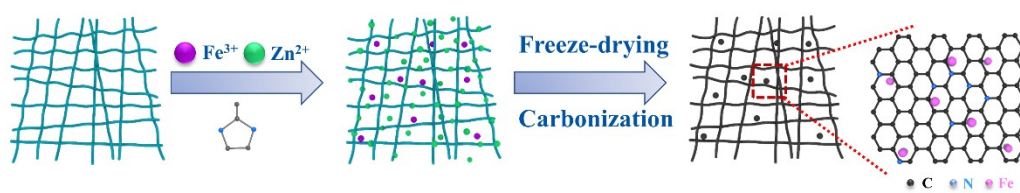

**Fig. S1.** Schematic illustration for the synthesis of sample Fe(Zn)-N-C.

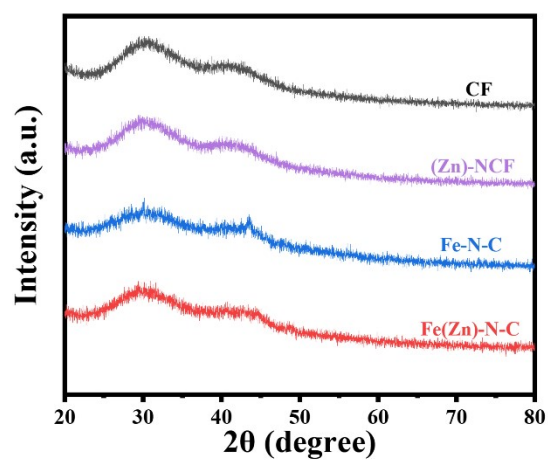

**Fig. S2.** XRD patterns of samples CF, Fe-N-C, (Zn)-N-C and Fe(Zn)-N-C.

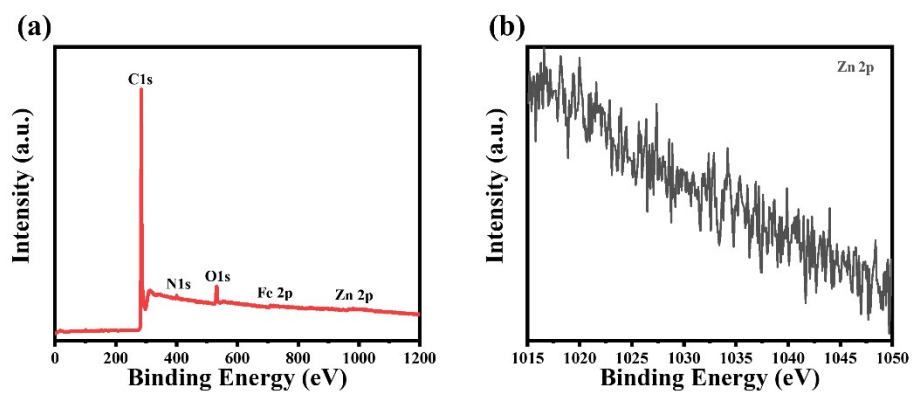

**Fig. S3.** (a) XPS survey and (b) Zn 2p spectra of Fe(Zn)-N-C catalyst.

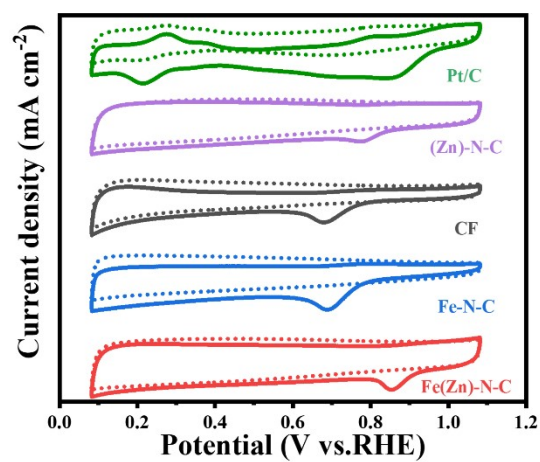

**Fig. S4.** CV curves of as-prepared catalysts in  $O_2/N_2$ -saturated 0.1 M KOH.

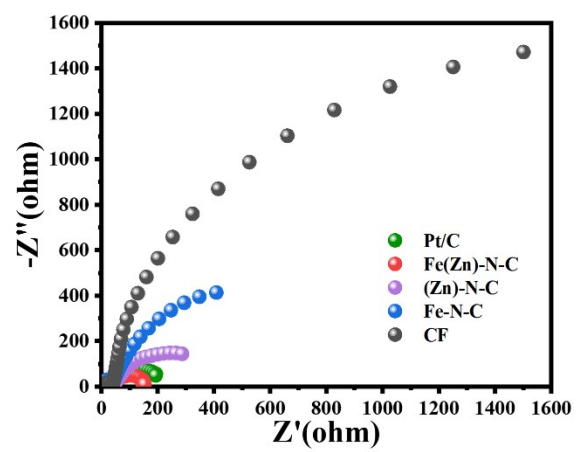

**Fig. S5.** Nyquist plots of Fe(Zn)-N-C and control samples in O<sub>2</sub> saturated 0.1 M KOH solution.

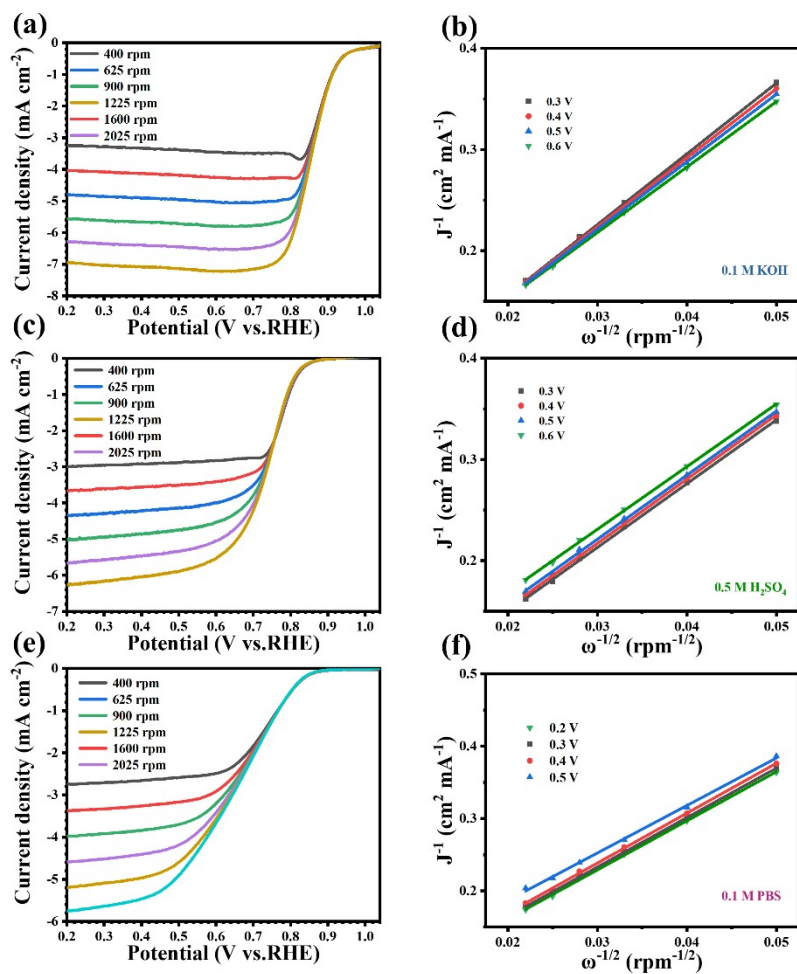

**Fig. S6.** (a, c, e) LSV curves at different rotating rates and (b, d, e) Koutecky-Levich (K-L) plots of the Fe(Zn)-N-C catalyst in  $O_2$  saturated 0.1 M KOH, 0.5  $H_2SO_4$  and 0.1 M PBS solutions, respectively.

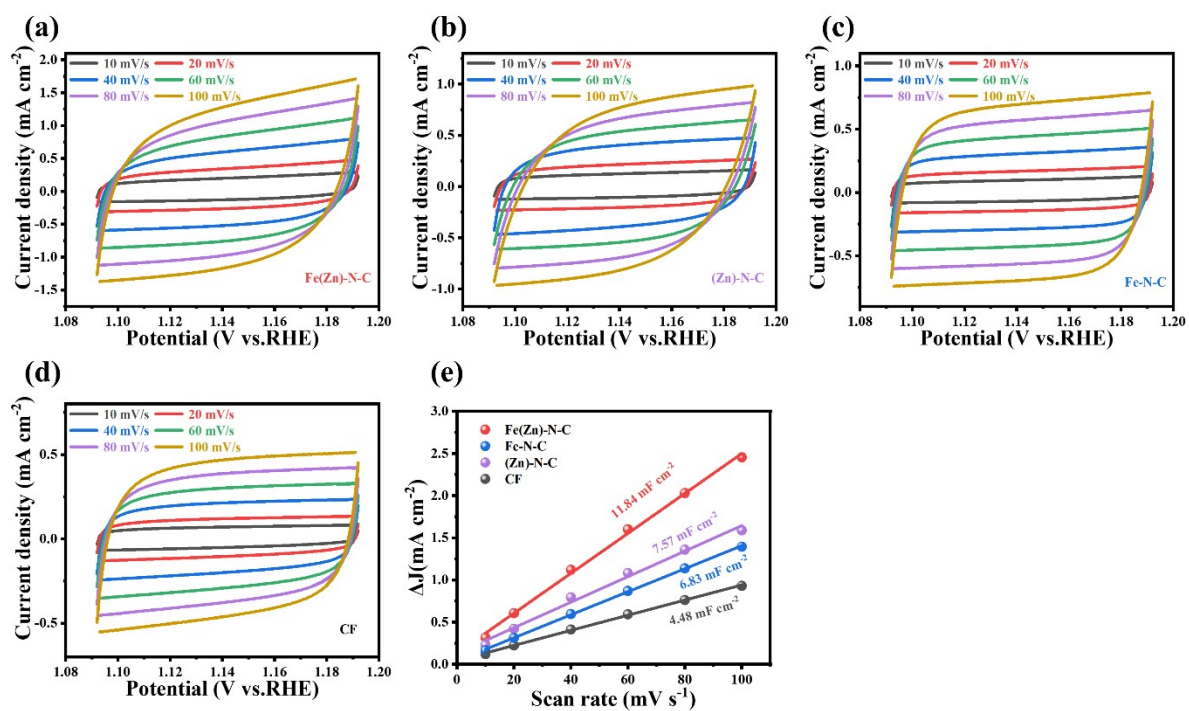

**Fig. S7.** CV curves of (a) Fe(Zn)-N-C, (b) (Zn)-N-C, (c) Fe-N-C, (d) CF at different scan rate; (e) Current density differences plotted against scan rates of various catalysts.

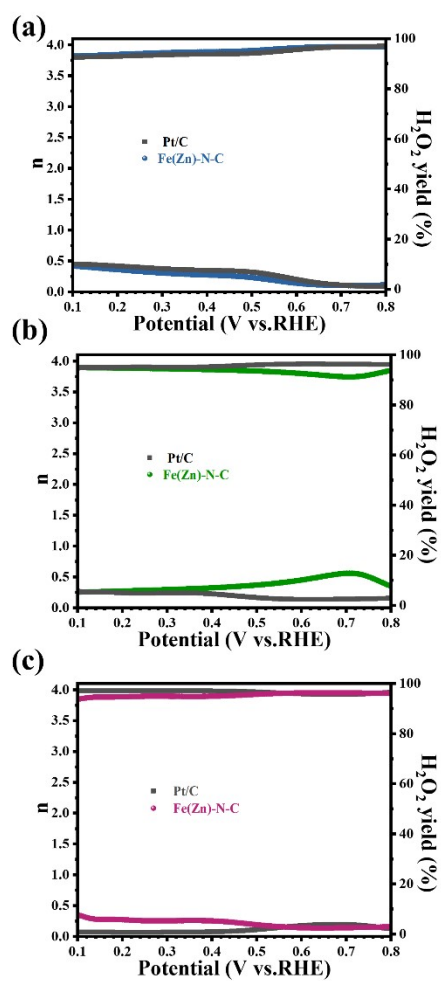

**Fig. S8.** Electron transfer number and peroxide yield derived from RRDE of the Fe(Zn)-N-C and Pt/C catalysts in  $\text{O}_2$  saturated 0.1 M KOH, 0.5 M  $\text{H}_2\text{SO}_4$  and 0.1 M PBS solutions, respectively.

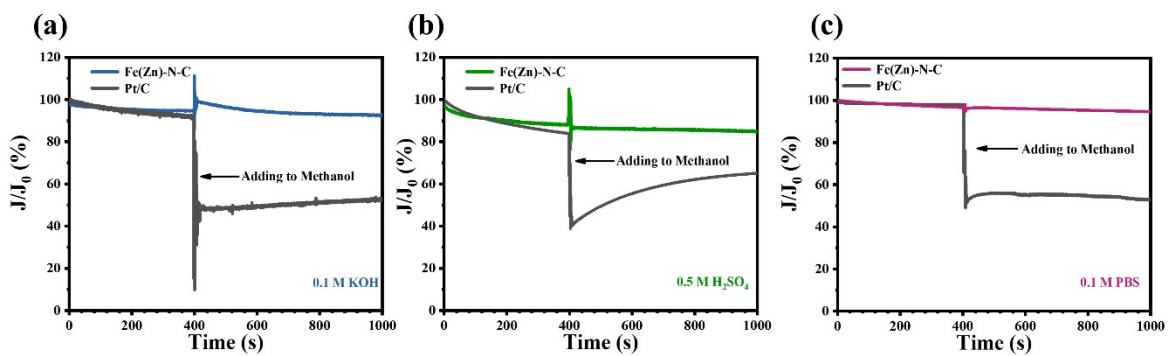

**Fig. S9.** Chronoamperometric response curves of Fe(Zn)-N-C and Pt/C catalysts before and after the addition of 3 mL methano about 400 s in O<sub>2</sub> saturated 0.1 M KOH, 0.5 M H<sub>2</sub>SO<sub>4</sub> and 0.1 M PBS solutions, respectively.

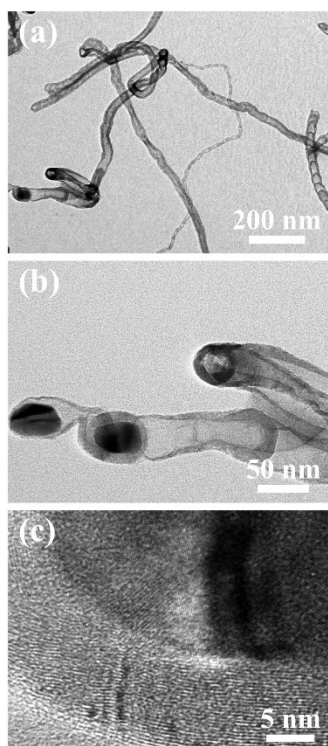

**Fig. S10.** TEM images of the Fe(Zn)-N-C catalyst after ORR stability test in 0.1 M KOH solution.

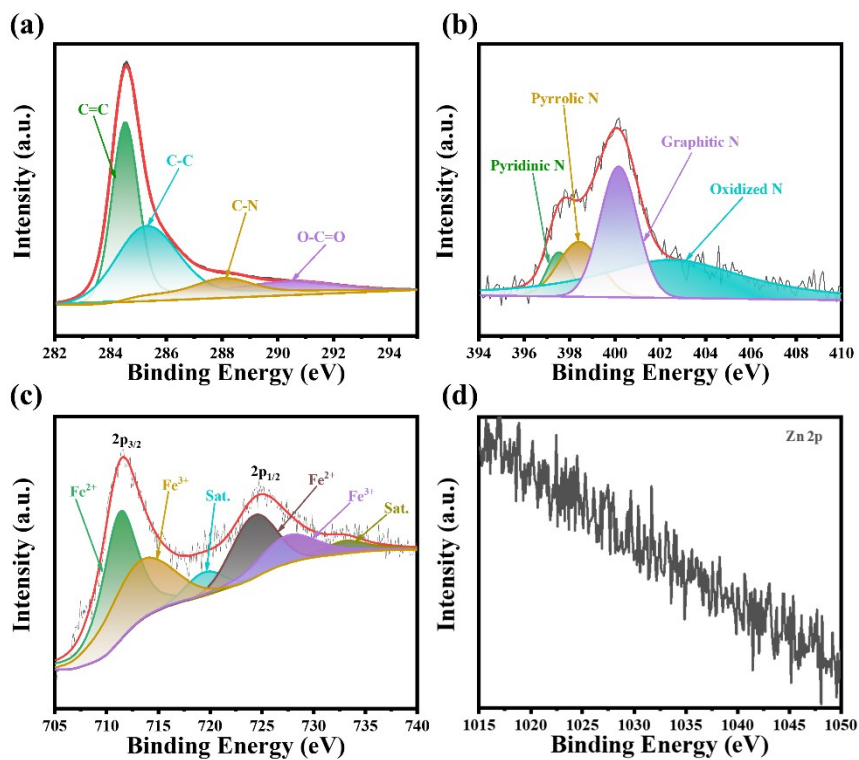

**Fig. S11.** High-resolution XPS spectra of (a) C 1s, (b) N 1s, (c) Fe 2p and (d) Zn 2p for Fe(Zn)-N-C catalyst after ORR stability test in 0.1 M KOH solution.

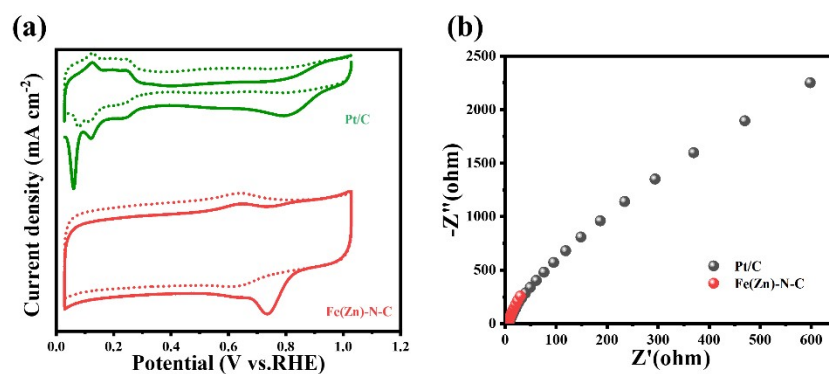

**Fig. S12.** (a) CV curves, (b) Nyquist plots of Fe(Zn)-N-C and Pt/C catalysts in 0.5 M H<sub>2</sub>SO<sub>4</sub> solution.

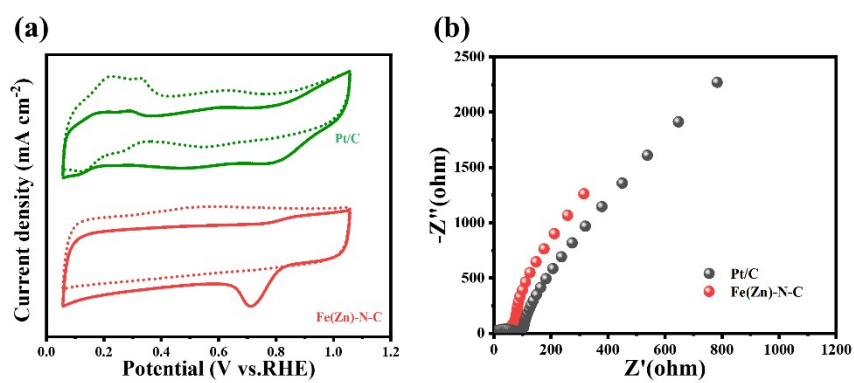

**Fig. S13.** (a) CV curves, (b) Nyquist plots of Fe(Zn)-N-C and Pt/C catalysts in 0.1 M PBS solution.

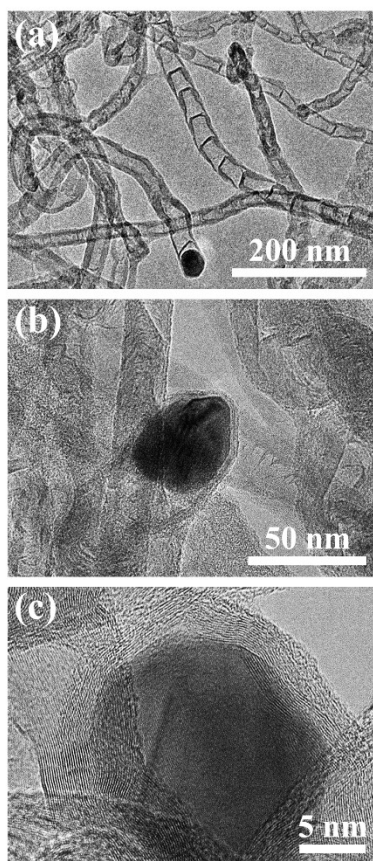

**Fig. S14.** TEM images of the Fe(Zn)-N-C catalyst after ORR stability test in 0.5 M H<sub>2</sub>SO<sub>4</sub> solution.

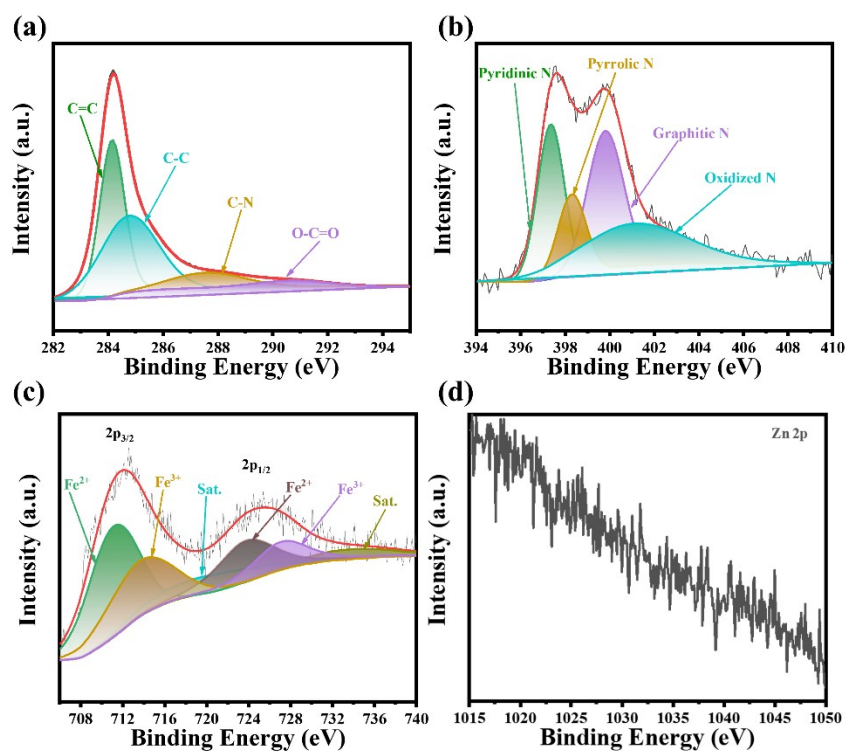

**Fig. S15.** High-resolution XPS spectra of (a) C 1s, (b) N 1s, (c) Fe 2p and (d) Zn 2p for Fe(Zn)-N-C catalyst after ORR stability test in 0.5 M H<sub>2</sub>SO<sub>4</sub> solution.

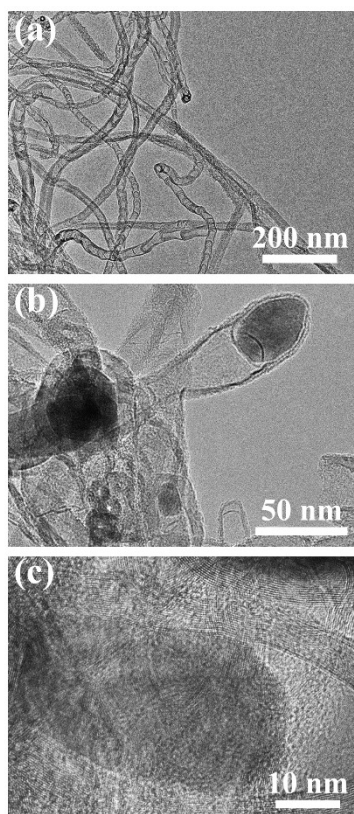

**Fig. S16.** TEM images of the Fe(Zn)-N-C catalyst after ORR stability test in 0.1 M PBS solution.

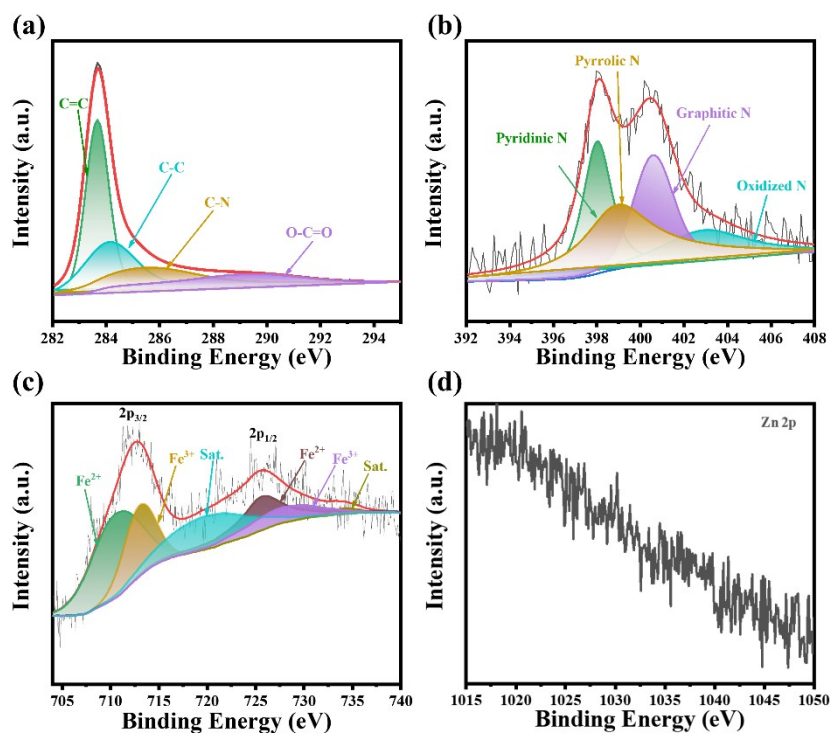

**Fig. S17.** High-resolution XPS spectra of (a) C 1s, (b) N 1s, (c) Fe 2p and (d) Zn 2p for Fe(Zn)-N-C catalyst after ORR stability test in 0.1 M PBS solution.

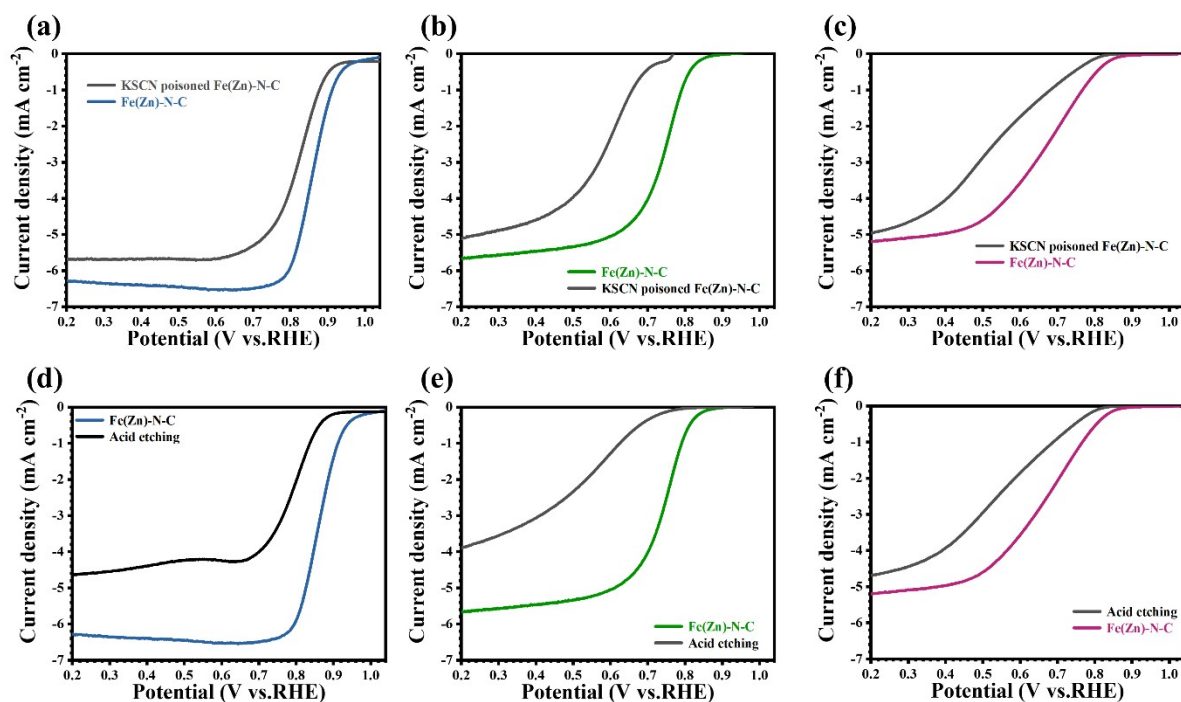

**Fig. S18.** (a-c) ORR polarization curves of Fe(Zn)-N-C and Pt/C catalysts with or without 10 mM KSCN, (d-f) before and after hot acid etching in O<sub>2</sub>-saturated 0.1 M KOH, 0.5 M H<sub>2</sub>SO<sub>4</sub> and 0.1 M PBS solutions, respectively.

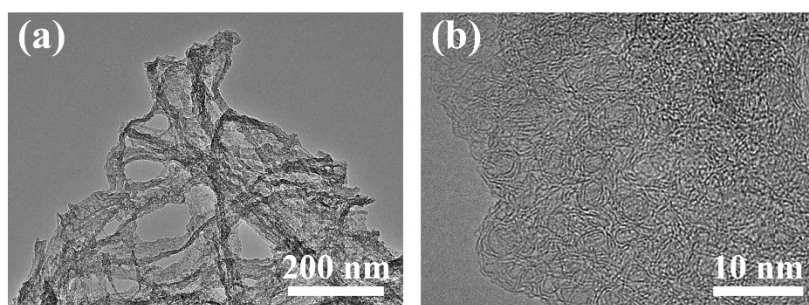

**Fig. S19.** TEM images of Fe(Zn)-N-C treated by hot acid etching.

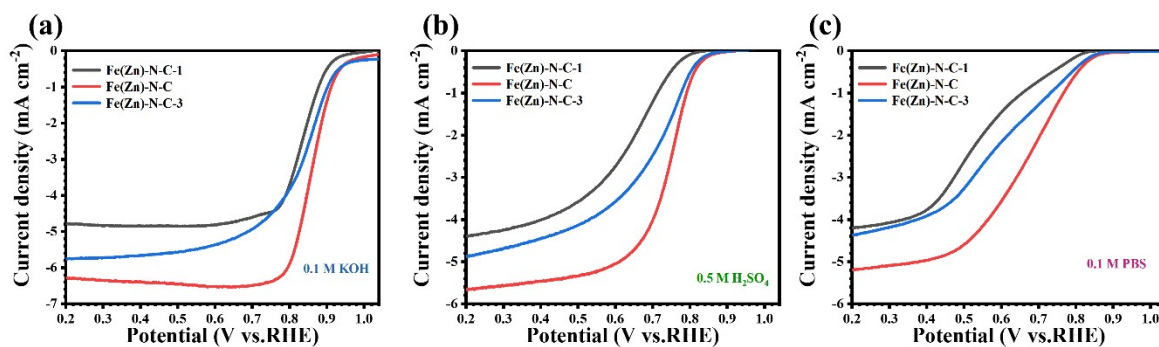

**Fig. S20.** LSV curves of ORR for the Fe catalysts pyrolyzed from the precursors of different Fe concentrations (FeCl<sub>3</sub>·6H<sub>2</sub>O concentration: 35, 50 and 65 mg) at a rotating rate of 1600 rpm in O<sub>2</sub>-saturated 0.1 M KOH, 0.5 M H<sub>2</sub>SO<sub>4</sub> and 0.1 M PBS solutions, respectively.

**Table S1.** The ORR performance of CF, (Zn)-N-C, Fe-N-C, Fe(Zn)-N-C and Pt/C catalysts in O<sub>2</sub>-saturated 0.1 M KOH, 0.5 M H<sub>2</sub>SO<sub>4</sub> and 0.1 M PBS solutions.

| Catalysts         | $E_{1/2}$<br>(V vs. RHE) | Limiting<br>current density<br>(mA cm <sup>-2</sup> ) | Tafel slop<br>(mV dec <sup>-1</sup> ) | Current<br>retention<br>after 86400 s<br>chronoampero<br>metric test (%) | Electrolyte                          |
|-------------------|--------------------------|-------------------------------------------------------|---------------------------------------|--------------------------------------------------------------------------|--------------------------------------|
| CF                | 0.62                     | 3.02                                                  | 100                                   | -                                                                        | 0.1 M KOH                            |
| (Zn)-N-C          | 0.76                     | 4.51                                                  | 80                                    | -                                                                        |                                      |
| Fe-N-C            | 0.65                     | 4.21                                                  | 94                                    | -                                                                        |                                      |
| <b>Fe(Zn)-N-C</b> | <b>0.86</b>              | <b>6.16</b>                                           | <b>66</b>                             | <b>85</b>                                                                |                                      |
| Pt/C              | 0.82                     | 5.68                                                  | 75                                    | 63                                                                       |                                      |
| <b>Fe(Zn)-N-C</b> | <b>0.74</b>              | <b>5.81</b>                                           | <b>61</b>                             | <b>80</b>                                                                | 0.5 M H <sub>2</sub> SO <sub>4</sub> |
| Pt/C              | 0.78                     | 4.74                                                  | 91                                    | 48                                                                       |                                      |
| <b>Fe(Zn)-N-C</b> | <b>0.67</b>              | <b>5.26</b>                                           | <b>76</b>                             | <b>82</b>                                                                | 0.1 M PBS                            |
| Pt/C              | 0.61                     | 4.65                                                  | 131                                   | 56                                                                       |                                      |

**Table S2.** Comparison of ORR performance of Fe(Zn)-N-C catalyst with non-precious electrocatalysts in 0.1 M KOH.

| Catalysts                   | $E_{1/2}$<br>(V vs. RHE) | Tafel slop<br>(mV dec <sup>-1</sup> ) | Stability                                     | Ref.             |
|-----------------------------|--------------------------|---------------------------------------|-----------------------------------------------|------------------|
| Fe/Fe <sub>3</sub> C@C      | 0.831                    | 87                                    | 94% retention after 20,000s                   | 2                |
| Fe-N-C/Fe <sub>3</sub> C-op | 0.911                    | 83.4                                  | 95% retention after 43,200s                   | 3                |
| SA-Ir/NC                    | 0.84                     | 65.1                                  | $E_{1/2}$ of 10 mV shift after 20,000 cycles  | 4                |
| NC@Co-HPNC                  | 0.83                     | 87.63                                 | $E_{1/2}$ of 5 mV shift after 2,000 cycles    | 5                |
| FeNPC                       | 0.904                    | 84                                    | 92.2% retention after 36,000s                 | 6                |
| Fe <sub>H</sub> -N-C        | 0.91                     | 58                                    | $E_{1/2}$ of 29 mV shift after 100,000 cycles | 7                |
| CuCo-NC/NPs                 | 0.87                     | 64.3                                  | 93% retention after 72,000s                   | 8                |
| Fe SA/NCZ                   | 0.87                     | 70                                    | $E_{1/2}$ of 10 mV shift after 10,000 cycles  | 9                |
| Fe <sub>0.5</sub> Co@HOMNCP | 0.903                    | 82                                    | 96.4% retention after 36,000s                 | 10               |
| <b>Fe(Zn)-N-C</b>           | <b>0.86</b>              | <b>66</b>                             | <b>85% retention after 86,400s</b>            | <b>This work</b> |

**Table S3.** Comparison of ORR performance of Fe(Zn)-N-C catalyst with non-precious electrocatalysts in acidic media.

| Catalysts                            | Electrolyte                                  | $E_{1/2}$<br>(V vs. RHE) | Tafel slop<br>(mV dec <sup>-1</sup> ) | Stability                                          | Ref.                 |
|--------------------------------------|----------------------------------------------|--------------------------|---------------------------------------|----------------------------------------------------|----------------------|
| Fe-pyridinic N-C                     | 0.1 M<br>HClO <sub>4</sub>                   | 0.825                    | 63.8                                  | 83.4% retention<br>after 28,800s                   | 11                   |
| PNC-30                               | 0.1 M<br>HClO <sub>4</sub>                   | 0.76                     | 65                                    | 93.2% retention<br>after 20,000s                   | 12                   |
| H-S-Fe-NC                            | 0.1 M<br>HClO <sub>4</sub>                   | 0.782                    | -                                     | 91.8% retention<br>after 36,000s                   | 13                   |
| Co <sub>x</sub> Fe <sub>y</sub> @N-C | 0.5 M<br>H <sub>2</sub> SO <sub>4</sub>      | 0.83                     | 97                                    | $E_{1/2}$ of 18 mV<br>shift after 5,000<br>cycles  | 14                   |
| Fe/Ni-N-PCS                          | 0.1 M<br>HClO <sub>4</sub>                   | 0.71                     | 126                                   | -                                                  | 15                   |
| Fe@MNC-OAc                           | 0.1 M<br>HClO <sub>4</sub>                   | 0.838                    | 70.4                                  | 96.27%<br>retention after<br>15,000s               | 16                   |
| Fe <sub>1</sub> NGF                  | 0.1 M<br>HClO <sub>4</sub>                   | 0.813                    | 74                                    | Slight shift of<br>$E_{1/2}$ after 5,000<br>cycles | 17                   |
| Mn-Fe@NCNTs                          | 0.1 M<br>HClO <sub>4</sub>                   | 0.76                     | 78.5                                  | 90.1% retention<br>after 29,000s                   | 18                   |
| D-MN4-CNF-IL-A                       | 0.5 M<br>H <sub>2</sub> SO <sub>4</sub>      | 0.71                     | 61                                    | ~86% retention<br>after 43,200s                    | 19                   |
| <b>Fe(Zn)-N-C</b>                    | <b>0.5 M<br/>H<sub>2</sub>SO<sub>4</sub></b> | <b>0.74</b>              | <b>61</b>                             | <b>80% retention<br/>after 86,400s</b>             | <b>This<br/>work</b> |

**Table S4.** Comparison of ORR performance of Fe(Zn)-N-C catalyst with non-precious electrocatalysts in neutral media.

| Catalysts                                                                  | $E_{1/2}$<br>(V vs. RHE) | Tafel slop<br>(mV dec <sup>-1</sup> ) | Stability                              | Ref.                 |
|----------------------------------------------------------------------------|--------------------------|---------------------------------------|----------------------------------------|----------------------|
| NiFe <sub>2</sub> O <sub>4</sub> /FeNi <sub>2</sub> S <sub>4</sub><br>HNSs | 0.507                    | -                                     | almost no decay after<br>5,000 cycles  | 20                   |
| Fe-N-C/800-<br>HT2                                                         | 0.743                    | 91                                    | 89.4% retention after<br>28,800s       | 21                   |
| G/C-Fe-2                                                                   | -                        | -                                     | 78.7% retention after<br>10,000s       | 22                   |
| FePc@CTS                                                                   | 0.057V vs.<br>Ag/AgCl    | 51.3                                  | -                                      | 23                   |
| eFe-N <sub>3</sub> /PCF                                                    | 0.72                     | -                                     | 89.9% retention after<br>10,000s       | 24                   |
| Fe <sub>x</sub> N/NC-7                                                     | 0.80                     | -                                     | -                                      | 25                   |
| Fe SAs/NC                                                                  | 0.75                     | 67.4                                  | -                                      | 26                   |
| 5%Fe-N/C                                                                   | 0.64                     | -                                     | -                                      | 27                   |
| <b>Fe(Zn)-N-C</b>                                                          | <b>0.61</b>              | <b>76</b>                             | <b>82% retention after<br/>86,400s</b> | <b>This<br/>work</b> |

**Table S5.** Comparison of  $E_{1/2}$  of Fe(Zn)-N-C catalyst with pH-universal non-precious electrocatalysts in alkaline, acidic and neutral media.

| Catalysts                                         | Alkaline<br>$E_{1/2}$<br>(V vs. RHE) | Acidic<br>$E_{1/2}$<br>(V vs. RHE) | Neutral<br>$E_{1/2}$<br>(V vs. RHE) | Ref.                 |
|---------------------------------------------------|--------------------------------------|------------------------------------|-------------------------------------|----------------------|
| CeNCs                                             | 0.9                                  | 0.83                               | 0.78                                | 28                   |
| $\gamma$ -Fe <sub>2</sub> O <sub>3</sub> @CNFs-12 | 0.905                                | 0.693                              | 0.58                                | 29                   |
| FeSA/PNC                                          | 0.92                                 | 0.84                               | 0.83                                | 30                   |
| Fe/Fe <sub>3</sub> C/NHCS                         | 0.84                                 | 0.67                               | 0.71                                | 31                   |
| MFS-Fe-0.7                                        | 0.83                                 | 0.64                               | 0.76                                | 32                   |
| Fe-N/C                                            | 0.823                                | 0.661                              | positive than<br>Pt/C catalyst      | 33                   |
| Fe/NC-3                                           | 0.90<br>(1 M KOH)                    | 0.71                               | 0.69                                | 34                   |
| Fe-Zn-SA/NC                                       | 0.85                                 | 0.78                               | 0.72                                | 35                   |
| Fe-NX@NSCST-ZL                                    | 0.94                                 | 0.77                               | 0.74                                | 36                   |
| <b>Fe(Zn)-N-C</b>                                 | <b>0.86</b>                          | <b>0.74</b>                        | <b>0.61</b>                         | <b>This<br/>work</b> |

**Table S6.** Comparison of reported alkaline/neutral liquid Zn-air batteries based on well-developed non-precious oxygen catalysts .

| Catalysts                          | Electrolyte                                               | Power Density<br>(mW cm <sup>-2</sup> ) | Specific capacity@10<br>mA cm <sup>-2</sup><br>(mAh g <sup>-1</sup> ) | Ref.         |
|------------------------------------|-----------------------------------------------------------|-----------------------------------------|-----------------------------------------------------------------------|--------------|
| Fe <sub>1</sub> /d-CN              | 6 M KOH<br>+0.2 M Zn(Ac) <sub>2</sub>                     | 144                                     | 770                                                                   | 37           |
|                                    | 4 M NH <sub>4</sub> Cl+2 M<br>KCl                         | 34                                      | 653                                                                   |              |
| Fc@Fe-<br>NHCS                     | 6 M KOH                                                   | 196                                     | 769@100 mA<br>cm <sup>-2</sup>                                        | 38           |
|                                    | 4 M NH <sub>4</sub> Cl+1 M<br>KCl                         | 58                                      | -                                                                     |              |
| Fe-NBrGo                           | 6 M KOH+0.15 M<br>ZnO                                     | 107                                     | -                                                                     | 39           |
|                                    | 4 M NH <sub>4</sub> Cl+2 M<br>KCl                         | 34                                      | -                                                                     |              |
| NHCS@B <sub>1</sub> P <sub>2</sub> | 6 M KOH                                                   | 158.5                                   | -                                                                     | 40           |
|                                    | 4 M NH <sub>4</sub> Cl+1 M<br>KCl                         | 104.6                                   | -                                                                     |              |
| Fe-<br>NC@NHCS-<br>600             | 6 M KOH                                                   | 278.97                                  | -                                                                     | 41           |
|                                    | 4 M NH <sub>4</sub> Cl+1 M<br>KCl                         | 114.96                                  | -                                                                     |              |
| FeCo<br>SAs@Co/N-<br>GC            | 6 M KOH                                                   | 207                                     | 741@5 mA cm <sup>-2</sup>                                             | 42           |
|                                    | 3 M Zn(TFSI) <sub>2</sub>                                 | 162                                     | 813@2 mA cm <sup>-2</sup>                                             |              |
| SA-Ir/NC                           | 0.1 M PBS+ 0.02<br>M Zn(CH <sub>3</sub> COO) <sub>2</sub> | 76                                      | 776.8 @20 mA<br>cm <sup>-2</sup>                                      | 4            |
| Fe(Zn)-N-C                         | 6 M KOH                                                   | 193                                     | 800                                                                   | This<br>work |
|                                    | 4 M NH <sub>4</sub> Cl+2 M<br>KCl                         | 48                                      | 688                                                                   |              |

## Reference

1. Y. Ma, D. Chen, Z. Fang, Y. Zheng, W. Li, S. Xu, X. Lu, G. Shao, Q. Liu and W. Yang, *Proc. Natl. Acad. Sci. U. S. A.*, 2021, **118**, e2105610118.
2. W. Dong, T. Wang, W. Yang, K. Song and Z. Zou, *Electrochem. Commun.*, 2023, **150**, 107477.
3. J. Chang, Q. Zhang, J. Yu, W. Jing, S. Wang, G. Yin, G. I. N. Waterhouse and S. Lu, *Adv. Sci.*, 2023, **10**, 2301656.
4. X. Luo, M. Yang, W. Song, Q. Fang, X. Wei, L. Jiao, W. Xu, Y. Kang, H. Wang, N. Wu, W. Gu, L. Zheng, L. Hu and C. Zhu, *Adv. Funct. Mater.*, 2021, **31**, 2101193.
5. Z. Chi, Y. Feng, Y. Ma, D. Kong, H. Yin, S. Li, L. Li, Z. Guo and L. Wang, *Chem. Commun. (Camb)*, 2021, **57**, 11248-11251.
6. L. Fan, X. Wei, X. Li, Z. Liu, M. Li, S. Liu, Z. Kang, F. Dai, X. Lu and D. Sun, *Nano Research*, 2022, **16**, 1810-1819.
7. H. Tian, A. Song, P. Zhang, K. Sun, J. Wang, B. Sun, Q. Fan, G. Shao, C. Chen, H. Liu, Y. Li and G. Wang, *Adv. Mater.*, 2023, **35**, e2210714.
8. J. Feng, D. Zheng, R. Yin, X. Niu, X. Xu, S. Meng, S. Ma, W. Shi, F. Wu, W. Liu and X. Cao, *Small Struct.*, 2023, **4**, 2200340.
9. C. Jiao, Z. Xu, J. Shao, Y. Xia, J. Tseng, G. Ren, N. Zhang, P. Liu, C. Liu, G. Li, S. Chen, S. Chen and H. L. Wang, *Adv. Funct. Mater.*, 2023, **33**, 2213897.
10. W. Li, B. Liu, D. Liu, P. Guo, J. Liu, R. Wang, Y. Guo, X. Tu, H. Pan, D. Sun, F. Fang and R. Wu, *Adv. Mater.*, 2022, **34**, e2109605.
11. L. Li, Y. Wen, G. Han, Y. Liu, Y. Song, W. Zhang, J. Sun, L. Du, F. Kong, Y. Ma, Y. Gao, J. Wang, C. Du and G. Yin, *Chem. Eng. J.*, 2022, **437**, 135320.
12. B. Liu, F. Liu, D. Lu, S. Zhang, C. Zhang, Z. Gao, L. Shi, Y. Liu, J. X Shi, L. Zhang, S. Zhao and D. Liu, *Chem. Eng. J.*, 2022, **430**, 132762.
13. J. Yan, T. Gu, R. Shi, X. Chen, M. H. Rummeli and R. Yang, *J. Mater. Chem. A*, 2023, **11**, 16180-16189.
14. J. Liu, Z. P. Li and B. H. Liu, *J. Alloy. Compd.*, 2023, **944**, 169166.
15. J. Zhao, L. Zong, L. Cui, F. Lu, Z. Xiao and L. Wang, *J. Colloid Interface Sci.*, 2023, **633**, 828-835.
16. Y. Liu, F. Tu, Z. Zhang, Z. Zhao, P. Guo, L. Shen, Y. Zhang, L. Zhao, G. Shao and Z. Wang, *Appl. Catal. B-Environ.*, 2023, **324**, 122209.
17. F. Li, G.-F. Han, W. Che, J.-M. Seo, W. Zou, H. Liu, I. Ahmad, Z. Fu, Y. Lu and J.-B. Baek, *Nano Energy*, 2023, **114**, 108647.
18. X. Guo, S. Xue, X. Zhang, J. Qin, M. Hong, Q. Chen, W. Liu, C. Du and J. Chen, *J. Alloy. Compd.*, 2023, **953**, 169992.
19. K. Muuli, M. Mooste, S. Akula, V. Gudkova, M. Otsus, A. Kikas, J. Aruväli, A. Treshchalov, V. Kisand, A. Tamm, A. Krumme, S. Cavaliere and K. Tammeveski, *ChemElectroChem*, 2023, **10**, e202300131.
20. L. An, Z. Zhang, J. Feng, F. Lv, Y. Li, R. Wang, M. Lu, R. B. Gupta, P. Xi and S. Zhang, *J. Am. Chem. Soc.*, 2018, **140**, 17624-17631.
21. G. Zhang, L. Li, M. Chen and F. Yang, *J. Mater. Chem. A*, 2020, **8**, 9256-9267.
22. H. Wang, L. Wei and J. Shen, *Int. J. Hydrogen Energy*, 2022, **47**, 17982-17991.
23. Y. Zhang, J. Li, W. Yang, J. Zhang, Q. Fu, Y.-C. Song, Z. Wei, Q. Liao and X. Zhu, *Electrochim. Acta*, 2020, **363**, 137177.
24. J. Liu, Z. Gong, C. Allen, W. Ge, H. Gong, J. Liao, J. Liu, K. Huang, M. Yan, R. Liu, G. He, J. Dong, G. Ye and H. Fei, *Chem Catalysis*, 2021, **1**, 1291-1307.
25. X. Hu, Y. Min, L. L. Ma, J. Y. Lu, H.C. Li, W.J. Liu, J.J. Chen and H.Q. Yu, *Appl. Catal.*

- B-Environ., 2020, **268**, 118405.
26. Z. Li, S. Ji, C. Xu, L. Leng, H. Liu, J. H. Horton, L. Du, J. Gao, C. He, X. Qi, Q. Xu and J. Zhu, *Adv. Mater.*, 2023, **35**, 2209644.
  27. L.Q. Yu, H. Wang, S.L. Chen, T.E. Wen, B.C. Huang and R.C. Jin, *Chinese Chem. Lett.*, 2023, **34**, 107236.
  28. Y. Zhao, H. Wang, J. Li, Y. Fang, Y. Kang, T. Zhao and C. Zhao, *Adv. Funct. Mater.*, 2023, 2305268.
  29. Z. Yao, Y. Li, D. Chen, Y. Zhang, X. Bao, J. Wang and Q. Zhong, *Chem. Eng. J.*, 2021, **415**, 129033.
  30. W. Xue, Q. Zhou, X. Cui, J. Zhang, S. Zuo, F. Mo, J. Jiang, X. Zhu and Z. Lin, *Angew Chem. Int. Ed. Engl.*, 2023, **62**, e202307504.
  31. Y. Liu, X. Wang, B. Zhao, X. Shao and M. Huang, *Chem.-Eur. J.*, 2019, **25**, 9650-9657.
  32. F. Zhang, Y. Chen, Y. Liu, X. Liu and S. Gao, *Int. J. Hydrogen Energ.*, 2021, **46**, 37895-37906.
  33. X. Luo, W. Han, W. Du, Z. Huang, Y. Jiang and Y. Zhang, *J. Power Sources*, 2020, **469**, 228184.
  34. M. Liu, J. Lee, T. C. Yang, F. Zheng, J. Zhao, C. M. Yang and L. Y. S. Lee, *Small Methods*, 2021, **5**, e2001165.
  35. J. Xu, S. Lai, D. Qi, M. Hu, X. Peng, Y. Liu, W. Liu, G. Hu, H. Xu, F. Li, C. Li, J. He, L. Zhuo, J. Sun, Y. Qiu, S. Zhang, J. Luo and X. Liu, *Nano Research*, 2020, **14**, 1374-1381.
  36. C. Li, Y. Zhang, M. Yuan, Y. Liu, H. Lan, Z. Li, K. Liu and L. Wang, *Chem. Eng. J.*, 2023, **471**, 144515.
  37. M. Zhao, H. Liu, H. Zhang, W. Chen, H. Sun, Z. Wang, B. Zhang, L. Song, Y. Yang, C. Ma, Y. Han and W. Huang, *Energy Environ. Sci.*, 2021, **14**, 6455-6463.
  38. K. Sheng, J. Li, G. Li, J. Hao, Y. Wang, Y. Liu, Y. Liu, Q. Yi and W. Li, *Appl. Surf. Sci.*, 2022, **601**, 154221.
  39. Y. Irmawati, F. Balqis, P. B. Persada, F. Destyorini, R. Yudianti, F. Iskandar and A. Sumboja, *Batteries*, 2023, **9**, 356.
  40. Y. Wang, A. Chen, C. Fang and Q. Yi, *Ind. Eng. Chem. Res.*, 2022, **61**, 10969-10981.
  41. Y. Wang, R. Yi, A. Chen, C. Fang, Y. Wang, Q. Yi, M. Liu, S. Liu, S. Zhan and B. Zhong, *Energy Technol.*, 2022, **10**, 2200057.
  42. N. K. Wagh, D. H. Kim, S. H. Kim, S. S. Shinde and J. H. Lee, *ACS Nano*, 2021, **15**, 14683-14696.
